# Supplementary material
Source: PubMed Central journal article supplement (PMC8508128)
Supplement: jb.00394-21-s0001.pdf [file jb.00394-21-s0001.pdf]

## Supplemental Material

**Table S1 – List of oligonucleotides used in this study**

| Plasmid made               | Sequence                                                             | Primer name            |
|----------------------------|----------------------------------------------------------------------|------------------------|
| <i>ΔspoVAD</i>             | AGCTATGACCGCGGCCGCTGTATCCATATGGACT<br>CAAAGTGAAATAGGAGAGATGCTCAA     | spoVAD_ndeI_L          |
|                            | CTACTCATTACTATTACTACTGCATGTGCTGTTT<br>TTTTTCCAATTCTTTATTTTTCATATTTTC | spoVAD_ndeI_R          |
|                            | ATGAAAAATAAAGAATTGAAAAAGAACAGCAC<br>ATGCAGTAGTAATAGTAAATGAG          | spoVAD_KO_RHA_For      |
|                            | TGCCAAGCTTGCATGTCTGCAGGCCTCGAGAAAA<br>ATCATACTCTTCTTTTTTTATTGATT     | spoVAD_xhoI_R          |
| <i>ΔspoVAE</i>             | AGCTATGACCGCGGCCGCTGTATCCATATGATAT<br>CAACTGGAACCTATAGTGGTCCTAAG     | spoVAE_ndeI_L          |
|                            | TTTAAGCACCTAGAAACAGTTGAATAACTGATA                                    | 250_Downstream_VAE     |
|                            | TATACTGACTGTGGTATAGAGATGTTTAACC                                      | 250_Upstream_VAE       |
|                            | TGCCAAGCTTGCATGTCTGCAGGCCTCGAGGTA<br>GTTTTAACTCTTGATTATAGAAATCGCAGG  | spoVAE_xhoI_R          |
| Cell interaction plasmids  | ACTTTTTGAAGAAATTCTATAGCTCGATCGATACT<br>TTAGAGAGGTGTTTAGTATG          | 5' SpoVAC LgBit Gibson |
|                            | ACCACCACCACCCTAGAACCTGCGGCCGCAAA<br>CATCTTAAAAATATAATAAATAATTC       | 3' SpoVAC LgBit Gibson |
|                            | CTTGATCGTAGCGTTAACAGATCTGAGCTCATACT<br>TTAGAGAGGTGTTTAGTATG          | 5' SpoVAC SmBit Gibson |
|                            | ACCACCACCACCCTAGAACCCCTCGAGAAAAAC<br>ATCTTAAAAATATAATAAATAATTC       | 3' SpoVAC SmBit Gibson |
|                            | ACTTTTTGAAGAAATTCTATAGCTCGATCGAAAAT<br>TAAAAAGGTGTGAAAATATG          | 5' SpoVAD LgBit Gibson |
|                            | ACCACCACCACCCTAGAACCTGCGGCCGCTC<br>ATTTACTATTACTACTGCATG             | 3' SpoVAD LgBit Gibson |
|                            | CTTGATCGTAGCGTTAACAGATCTGAGCTCAAAA<br>TAAAAAGGTGTGAAAATATG           | 5' SpoVAD SmBit Gibson |
|                            | ACCACCACCACCCTAGAACCCCTCGAGACTCA<br>TTTACTATTACTACTGCATGTG           | 3' SpoVAD SmBit Gibson |
|                            | ACTTTTTGAAGAAATTCTATAGCTCGATCGAATGA<br>GTAGGAAGTGATATAATATG          | 5' SpoVAE LgBit Gibson |
|                            | ACCACCACCACCCTAGAACCTGCGGCCGCTGG<br>TTTTGCTTTTGGAG                   | 3' SpoVAE LgBit Gibson |
|                            | CTTGATCGTAGCGTTAACAGATCTGAGCTCAATG<br>AGTAGGAAGTGATATAATATG          | 5' SpoVAE SmBit Gibson |
|                            | ACCACCACCACCCTAGAACCCCTCGAGATGGT<br>TTTTGCTTTTGGAG                   | 3' SpoVAE SmBit Gibson |
|                            | AGACTTTTTGAAGAAATTCTATAGCTCGATCGCTG<br>CAGTAAAGGAGAAAAATTTG          | 5' LgBit Gibson        |
|                            | AAAGTTTTATTTAACTTATAGGATCCAGCCTAAC<br>TGTTTATAGTTACTCTAAACAAC        | 3' LgBit Gibson        |
| Spore interaction plasmids | ATTTTTTATCAGGAAACAGCTATGACCGCTAAGC<br>ATGAAAGGAGAAAGTG               | 5' SpoVAC prm          |
|                            | GTCTACATTTTTTTATAATTTTTATCCATACTAAA<br>CACCTCTCTAAAGTATTATTTG        | 3' SpoVAC prm-SpoVAC   |
|                            | ATAGGTTTTTTTTTAAATTAACAAATAACTTT<br>TAGAGAGGTGTTTAG                  | 5' SpoVAC RBS          |
|                            | ACGTTGTAAAACGACGGCCAGTGCCAAGCTCTAA<br>CTGTTTATAGTTACTCTAAACAAC       | 3' LgBit-pJS116        |

|                                                                       |                                                                   |                                                  |
|-----------------------------------------------------------------------|-------------------------------------------------------------------|--------------------------------------------------|
|                                                                       | TGTTCTTTTTCCAATTCTTTATTTTTTCACTAAA<br>CACCTCTCTAAAGTATTATTTG      | 3' spoVAC pr. - spoVAD Gibson                    |
|                                                                       | AACAAATAACTTTTAGAGAGGTGTTTAGTATGAA<br>AAATAAAAGAATTGGAAAAAG       | 5' SpoVAC prm-SpoVAD                             |
| Mid-gene<br>reporter<br>insertion<br>spore<br>interaction<br>plasmids | ACAGGTTATAGACTTTTTGAAGAAATTCTACTAGG<br>TGCTAGTTCTGC               | 5' SpoVAC downstream (linker-<br>SmBit)          |
|                                                                       | TTTCACACCTTTTTAATTTTTCGATCGAGCTAAAAC<br>ATCTTAAAAATATAATAAATAATTC | 3' SpoVAC downstream (linker-<br>SmBit)          |
|                                                                       | ACCACCAGAACCACCACCACCCTAGAACCTTTA<br>TCAAGACCTCCAACCTTTCATATAC    | 3' SpoVAC upstream (linker-SmBit)                |
|                                                                       | TTATATTTTTAAGATGTTTTAGCTCGATCGAAAATT<br>AAAAAGGTGTGAAAATATG       | 5' SpoVAC-SpoVAD                                 |
|                                                                       | TTGTATATGAAAGTTGGAGGTCTTGATAAAGGTTT<br>TAGTGGTGGTGGT              | 5' linker-SmBit (SpoVAC)                         |
|                                                                       | TGTTATTGATGTTGCAGAACTAGCACCTAGTAGA<br>ATTTCTTCAAAAAGTCTATAACCTG   | 3' linker-SmBit (SpoVAC)                         |
|                                                                       | TCTATGTTGTTTAGAGTAACTATAAACAGTCTAGG<br>TGCTAGTTCTGCAAC            | 5' linker-LgBit (SpoVAC)                         |
|                                                                       | GTAACGACGGCCAGTGCCAAGCTGCCTAAAA<br>CATCTTAAAAATATAATAAATAATTCC    | 3' Linker-LgBit (SpoVAC)                         |
|                                                                       | AAACACCTCTCTAAAGTATCGATCGAGCTATAGA<br>ATTTCTTCAAAAAGTCTATAACCTG   | 3' SmBit-SpoVAC RBS                              |
|                                                                       | TGTTATTGATGTTGCAGAACTAGCACCTAGACTG<br>TTTATAGTTACTCTAAACAACATAG   | 3' Linker-LgBit                                  |
|                                                                       | ATATCACTTCTACTCATTGATCGAGCTAAAACA<br>TCTTAAAAATATAATAAATAATTCC    | 3' SpoVAC downstream (linker-<br>SmBit) - SpoVAE |
|                                                                       | TTATATTTTTAAGATGTTTTAGCTCGATCGAATGA<br>GTAGGAAGTGATATAATATG       | 5' SpoVAC-SpoVAE                                 |
|                                                                       | AATAAATACTTTACATAGTCCATTAACATACTAA<br>ACACCTCTCTAAAGTATTATTTG     | 3' spoVAC pr. - spoVAE Gibson                    |
|                                                                       | AACAAATAACTTTTAGAGAGGTGTTTAGTATGTT<br>AATGGACTATGTAAGAGTATT       | 5' spoVAC pr. - spoVAE Gibson                    |
|                                                                       | TGTTCTTTTTCCAATTCTTTATTTTTTCACTAAA<br>CACCTCTCTAAAGTATTATTTG      | 3' spoVAC pr. - spoVAD Gibson                    |
|                                                                       | ATATCACTTCTACTCATTGATCGAGCTATAGAA<br>TTTCTTCAAAAAGTCTATAACCTG     | 3' spoVAD-SmBit                                  |
|                                                                       | ACTTTTTGAAGAAATTCTATAGCTCGATCGAATGA<br>GTAGGAAGTGATATAATATG       | 5' SpoVAE LgBit Gibson                           |
|                                                                       | ACCACCAGAACCACCACCACCCTAGAACCATAT<br>CCAAATCCTATTATAGGAAC         | 3' spoVAE-SpoVADSm                               |
|                                                                       | TCTATGTTGTTTAGAGTAACTATAAACAGTTCCT<br>TGCTACAGGAGTAATAAAATC       | 5' SpoVAE-plasmid LgBit Mid                      |
|                                                                       | GTTGTAACGACGGCCAGTGCCAAGCTGCTTAT<br>GGTTTTGCTTTTGGAGTAAATAC       | 3' SpoVAE-plasmid LgBit Mid                      |
|                                                                       | GGTTCTAGTGGTGGTGGTCTGGTGGTGGT<br>GGTTCTAGTGGTGGTTTTAC             | 5' SpoVAE LgBit Mid                              |
|                                                                       | AATTGATTTTACTCCTGTAGCAAGTGAAGTGT<br>TTATAGTTACTCTAAACAACATAG      | 3'SpoVAE LgBit Mid                               |
|                                                                       | ACCACCAGAACCACCACCACCCTAGAACCATAT<br>CCAAATCCTATTATAGGAAGT        | 3' SpoVAESm-SpoVADLg                             |
|                                                                       | GCAACAGTTCCTATAATAGGATTTGGATATGGTTC<br>TAGTGGTGGTGG               | 5' SpoVAE-SmBit                                  |
|                                                                       | TTGATTTTACTCCTGTAGCAAGTATAGAAATT<br>TCTTCAAAAAGTCTATAACCTG        | 3' SpoVAE-SmBit                                  |
|                                                                       | ACAGGTTATAGACTTTTTGAAGAAATTCTACT<br>TGCTACAGGAGTAAATAAAATC        | 5' SpoVAE Smbit Mid                              |
| ATTTTCACACCTTTTTAATTTTTCGATCGAGTTATG<br>GTTTTGCTTTTGGAGTAAATAC        | 3' SpoVAE Smbit Mid                                               |                                                  |
| TACTCCAAAAGCAAAACCATAACTCGATCGAAAAT<br>TAAAAAGGTGTGAAAATATG           | 5' SpoVAE SmBit mid - SpoVAD<br>LgBit                             |                                                  |
